# Supplementary material for: Gas-phase aldol condensation of formaldehyde to produce hydroxyacetaldehyde and its implication to new particle formation: a theoretical study
Source: Royal Society of Chemistry journal article supplement (doi:10.1039/d4ra08063g), 2024-01-01
Supplement: d4ra08063g1.pdf [file d4ra08063g1.pdf]

## Supporting Information

### **Gas-phase aldol condensation of formaldehyde to produce hydroxyacetaldehyde and its implication to new particle formation: a theoretical study**

Nianchi Tang,<sup>‡1</sup> Lijuan Zhang,<sup>‡1</sup> Jiao Chen,<sup>2</sup> Yue Pan,<sup>3</sup> Hongyang Xu,<sup>1</sup> Chunyu Wang<sup>\*1</sup>

*<sup>1</sup>School of Biological and Environmental Engineering, Chaohu University, Chaohu Regional Collaborative Technology Service Center for Rural Revitalization, Hefei, Anhui 238000, China*

*<sup>2</sup>Anhui Meteorological Observatory, Hefei, Anhui 230031, China*

*<sup>3</sup>School of Electronic Engineering, Chaohu University, Hefei, Anhui 238000, China*

*\*E-mail: [cyw2022@chu.edu.cn](mailto:cyw2022@chu.edu.cn)*

*<sup>‡</sup>These authors contributed equally to this work.*

## Contents

|                                                                                                                                                                                                                                                                                                                                                         |   |
|---------------------------------------------------------------------------------------------------------------------------------------------------------------------------------------------------------------------------------------------------------------------------------------------------------------------------------------------------------|---|
| Table S1. Cluster formation energies from monomers computed at the PW91/6-311++G(3df, 3pd) level of theory for $(\text{H}_2\text{SO}_4)_m(\text{C}_2\text{H}_4\text{O}_2)_n$ ( $0 \leq m, n \leq 3$ ) clusters. All values are at 298.15 K and 1atm reference pressure in kcal mol <sup>-1</sup> .....                                                  | 3 |
| Table S2. Coordinates of optimized global free energy minima obtained at the PW91PW91/6-311++G(3df, 3pd) level of theory for $(\text{H}_2\text{SO}_4)_m(\text{C}_2\text{H}_4\text{O}_2)_n$ ( $0 \leq m, n \leq 3$ ), $(\text{SA})_m(\text{H}_2\text{O})$ ( $0 \leq m \leq 3$ ), and $(\text{H}_2\text{SO}_4)_m(\text{NH}_3)$ ( $0 \leq m \leq 3$ )..... | 3 |

Table S1. Cluster formation energies from monomers computed at the PW91/6-311++G(3df, 3pd) level of theory for  $(\text{H}_2\text{SO}_4)_m(\text{C}_2\text{H}_4\text{O}_2)_n$  ( $0 \leq m, n \leq 3$ ) clusters. All values are at 298.15 K and 1atm reference pressure in kcal mol<sup>-1</sup>.

| Cluster                                                       | $\Delta E_{\text{elec}}$ | $\Delta H$ | $\Delta S$ |
|---------------------------------------------------------------|--------------------------|------------|------------|
| $(\text{H}_2\text{SO}_4)_2$                                   | -17.38                   | -16.54     | -0.04      |
| $(\text{H}_2\text{SO}_4)_3$                                   | -33.26                   | -31.73     | -0.08      |
| $(\text{C}_2\text{H}_4\text{O}_2)_2$                          | -9.56                    | -7.48      | -0.03      |
| $(\text{C}_2\text{H}_4\text{O}_2)_3$                          | -21.32                   | -18.01     | -0.07      |
| $(\text{H}_2\text{SO}_4)(\text{C}_2\text{H}_4\text{O}_2)$     | -12.48                   | -11.16     | -0.03      |
| $(\text{H}_2\text{SO}_4)_2(\text{C}_2\text{H}_4\text{O}_2)$   | -32.10                   | -30.45     | -0.07      |
| $(\text{H}_2\text{SO}_4)_3(\text{C}_2\text{H}_4\text{O}_2)$   | -49.42                   | -47.18     | -0.12      |
| $(\text{H}_2\text{SO}_4)(\text{C}_2\text{H}_4\text{O}_2)_2$   | -27.02                   | -24.15     | -0.07      |
| $(\text{H}_2\text{SO}_4)_2(\text{C}_2\text{H}_4\text{O}_2)_2$ | -47.18                   | -43.53     | -0.11      |
| $(\text{H}_2\text{SO}_4)_3(\text{C}_2\text{H}_4\text{O}_2)_2$ | -67.71                   | -63.72     | -0.15      |
| $(\text{H}_2\text{SO}_4)(\text{C}_2\text{H}_4\text{O}_2)_3$   | -43.23                   | -38.84     | -0.11      |
| $(\text{H}_2\text{SO}_4)_2(\text{C}_2\text{H}_4\text{O}_2)_3$ | -60.67                   | -55.94     | -0.15      |
| $(\text{H}_2\text{SO}_4)_3(\text{C}_2\text{H}_4\text{O}_2)_3$ | -74.17                   | -69.26     | -0.19      |

Table S2. Coordinates of optimized global free energy minima obtained at the PW91PW91/6-311++G(3df, 3pd) level of theory for  $(\text{H}_2\text{SO}_4)_m(\text{C}_2\text{H}_4\text{O}_2)_n$  ( $0 \leq m, n \leq 3$ ),  $(\text{SA})_m(\text{H}_2\text{O})$  ( $0 \leq m \leq 3$ ), and  $(\text{H}_2\text{SO}_4)_m(\text{NH}_3)$  ( $0 \leq m \leq 3$ ).

### $\text{C}_2\text{H}_4\text{O}_2$

|   |                 |                 |                 |
|---|-----------------|-----------------|-----------------|
| C | -0.727944000000 | -0.352813000000 | 0.099762000000  |
| O | -1.848672000000 | 0.056456000000  | -0.099420000000 |
| H | -0.521784000000 | -1.426009000000 | 0.346931000000  |
| C | 0.515705000000  | 0.520930000000  | 0.050344000000  |
| H | 0.423253000000  | 1.229156000000  | -0.788723000000 |
| H | 0.531103000000  | 1.119694000000  | 0.973617000000  |
| O | 1.724458000000  | -0.221634000000 | 0.027048000000  |
| H | 1.834577000000  | -0.610117000000 | -0.853489000000 |

### $(\text{H}_2\text{SO}_4)_1(\text{C}_2\text{H}_4\text{O}_2)_1$

|   |                 |                 |                 |
|---|-----------------|-----------------|-----------------|
| C | -2.006182000000 | 0.337673000000  | -0.199256000000 |
| O | -1.327346000000 | 1.324341000000  | 0.048637000000  |
| H | -1.568059000000 | -0.550438000000 | -0.702013000000 |
| C | -3.468956000000 | 0.251230000000  | 0.162644000000  |

|   |                 |                 |                 |
|---|-----------------|-----------------|-----------------|
| H | -3.592933000000 | 0.579943000000  | 1.208704000000  |
| H | -4.004140000000 | 0.986406000000  | -0.458126000000 |
| O | -4.041399000000 | -1.012585000000 | -0.103873000000 |
| H | -3.732624000000 | -1.649007000000 | 0.558552000000  |
| S | 1.795926000000  | -0.218238000000 | -0.099999000000 |
| O | 0.751635000000  | -1.206135000000 | -0.198108000000 |
| O | 3.066849000000  | -0.365957000000 | -0.751225000000 |
| O | 1.234423000000  | 1.198301000000  | -0.502212000000 |
| O | 2.050612000000  | -0.070509000000 | 1.492905000000  |
| H | 0.239173000000  | 1.251503000000  | -0.289110000000 |
| H | 2.896414000000  | 0.400352000000  | 1.612662000000  |

**(H<sub>2</sub>SO<sub>4</sub>)<sub>2</sub>(C<sub>2</sub>H<sub>4</sub>O<sub>2</sub>)<sub>1</sub>**

|   |                 |                 |                 |
|---|-----------------|-----------------|-----------------|
| C | 1.931953000000  | -1.478253000000 | -0.698415000000 |
| O | 1.066774000000  | -2.051490000000 | -0.041430000000 |
| H | 1.673329000000  | -0.838853000000 | -1.563267000000 |
| C | 3.372634000000  | -1.615605000000 | -0.355722000000 |
| H | 3.890847000000  | -1.984352000000 | -1.263061000000 |
| H | 3.753829000000  | -0.589397000000 | -0.189191000000 |
| O | 3.623605000000  | -2.446668000000 | 0.740466000000  |
| H | 2.757187000000  | -2.734274000000 | 1.084941000000  |
| S | -2.308671000000 | -0.874137000000 | 0.101654000000  |
| O | -1.496751000000 | -0.335473000000 | 1.207074000000  |
| O | -3.618318000000 | -1.365472000000 | 0.374607000000  |
| O | -2.453942000000 | 0.246077000000  | -1.001756000000 |
| O | -1.472638000000 | -2.003950000000 | -0.589630000000 |
| H | -1.587032000000 | 0.738237000000  | -1.114156000000 |
| H | -0.480216000000 | -1.964361000000 | -0.348490000000 |
| S | 0.662106000000  | 1.976550000000  | -0.006288000000 |
| O | -0.122526000000 | 1.541693000000  | -1.162523000000 |
| O | 1.985737000000  | 1.444185000000  | 0.142467000000  |
| O | 0.847200000000  | 3.556993000000  | -0.061751000000 |
| O | -0.199057000000 | 1.834797000000  | 1.282860000000  |
| H | -0.022243000000 | 3.982739000000  | -0.190693000000 |
| H | -0.748861000000 | 0.949245000000  | 1.259802000000  |

**(H<sub>2</sub>SO<sub>4</sub>)<sub>3</sub>(C<sub>2</sub>H<sub>4</sub>O<sub>2</sub>)<sub>1</sub>**

|   |                |                 |                 |
|---|----------------|-----------------|-----------------|
| C | 5.053977000000 | -0.501388000000 | 0.987333000000  |
| O | 4.183556000000 | -1.327718000000 | 1.222202000000  |
| H | 5.819967000000 | -0.292061000000 | 1.765999000000  |
| C | 5.199324000000 | 0.304540000000  | -0.267943000000 |
| H | 5.152390000000 | 1.368331000000  | 0.056256000000  |
| H | 6.240839000000 | 0.166642000000  | -0.608393000000 |
| O | 4.346342000000 | -0.006199000000 | -1.321038000000 |

|   |                 |                 |                 |
|---|-----------------|-----------------|-----------------|
| H | 3.420384000000  | 0.197415000000  | -1.073525000000 |
| S | -0.981215000000 | 2.678186000000  | -0.033310000000 |
| O | -1.433915000000 | 4.009400000000  | -0.300491000000 |
| O | -1.514953000000 | 1.528270000000  | -0.742328000000 |
| O | 0.576926000000  | 2.667477000000  | -0.167596000000 |
| O | -1.244658000000 | 2.327020000000  | 1.514639000000  |
| H | 0.937670000000  | 1.720394000000  | -0.239944000000 |
| H | -1.218336000000 | 3.158138000000  | 2.025716000000  |
| S | 1.004810000000  | -0.983629000000 | -0.144092000000 |
| O | 0.148803000000  | -0.991194000000 | 1.031030000000  |
| O | 1.682234000000  | 0.304157000000  | -0.395621000000 |
| O | 2.098778000000  | -2.073207000000 | -0.069678000000 |
| O | 0.231238000000  | -1.413970000000 | -1.398950000000 |
| H | 2.962429000000  | -1.730038000000 | 0.387892000000  |
| H | -0.786230000000 | -1.576526000000 | -1.209739000000 |
| S | -3.195331000000 | -1.485586000000 | -0.008273000000 |
| O | -2.210008000000 | -1.861141000000 | -1.033600000000 |
| O | -4.379894000000 | -2.265312000000 | 0.119897000000  |
| O | -2.462270000000 | -1.458263000000 | 1.388303000000  |
| O | -3.642357000000 | 0.000094000000  | -0.256266000000 |
| H | -1.482766000000 | -1.286600000000 | 1.269583000000  |
| H | -2.856947000000 | 0.596559000000  | -0.443403000000 |

**(C<sub>2</sub>H<sub>4</sub>O<sub>2</sub>)<sub>2</sub>**

|   |                 |                 |                 |
|---|-----------------|-----------------|-----------------|
| C | -1.669013000000 | 1.092523000000  | -0.240568000000 |
| O | -0.712044000000 | 1.812516000000  | -0.016646000000 |
| H | -2.319629000000 | 1.281001000000  | -1.125499000000 |
| C | -2.036005000000 | -0.148594000000 | 0.545064000000  |
| H | -1.346566000000 | -0.284048000000 | 1.391306000000  |
| H | -3.059458000000 | -0.040014000000 | 0.935067000000  |
| O | -2.030771000000 | -1.245019000000 | -0.357564000000 |
| H | -1.097067000000 | -1.529512000000 | -0.452119000000 |
| C | 1.669031000000  | -1.091828000000 | 0.242610000000  |
| O | 0.711502000000  | -1.812470000000 | 0.023196000000  |
| H | 2.321867000000  | -1.277767000000 | 1.126432000000  |
| C | 2.034340000000  | 0.147040000000  | -0.547440000000 |
| H | 3.056536000000  | 0.036619000000  | -0.940195000000 |
| H | 1.342531000000  | 0.280734000000  | -1.392058000000 |
| O | 2.032841000000  | 1.246003000000  | 0.352040000000  |
| H | 1.099446000000  | 1.529905000000  | 0.450863000000  |

**(H<sub>2</sub>SO<sub>4</sub>)<sub>1</sub>(C<sub>2</sub>H<sub>4</sub>O<sub>2</sub>)<sub>2</sub>**

|   |                 |                 |                |
|---|-----------------|-----------------|----------------|
| C | 0.301141000000  | -2.473168000000 | 0.905206000000 |
| O | -0.711111000000 | -2.030229000000 | 1.433780000000 |

|   |                 |                 |                 |
|---|-----------------|-----------------|-----------------|
| H | 1.098713000000  | -2.921376000000 | 1.537004000000  |
| C | 0.594474000000  | -2.469802000000 | -0.572892000000 |
| H | 0.107222000000  | -3.370569000000 | -0.988003000000 |
| H | 0.104491000000  | -1.599325000000 | -1.039169000000 |
| O | 1.972404000000  | -2.557511000000 | -0.838783000000 |
| H | 2.367469000000  | -1.667097000000 | -0.693997000000 |
| C | 2.700346000000  | 2.285268000000  | 0.178478000000  |
| O | 3.302277000000  | 2.055007000000  | 1.210159000000  |
| H | 2.309425000000  | 3.296881000000  | -0.062073000000 |
| C | 2.451443000000  | 1.199565000000  | -0.828080000000 |
| H | 1.362854000000  | 1.115954000000  | -0.988649000000 |
| H | 2.900956000000  | 1.502589000000  | -1.790816000000 |
| O | 3.001903000000  | -0.022549000000 | -0.376043000000 |
| H | 3.422427000000  | 0.193886000000  | 0.486101000000  |
| S | -2.196986000000 | 0.681025000000  | -0.266207000000 |
| O | -3.297102000000 | 1.200448000000  | -1.027407000000 |
| O | -0.854130000000 | 0.638240000000  | -0.794663000000 |
| O | -2.045260000000 | 1.547155000000  | 1.093142000000  |
| O | -2.622662000000 | -0.736368000000 | 0.252082000000  |
| H | -2.942027000000 | 1.781053000000  | 1.398161000000  |
| H | -1.834737000000 | -1.233121000000 | 0.686347000000  |

**(H<sub>2</sub>SO<sub>4</sub>)<sub>2</sub>(C<sub>2</sub>H<sub>4</sub>O<sub>2</sub>)<sub>2</sub>**

|   |                 |                 |                 |
|---|-----------------|-----------------|-----------------|
| C | -1.202755000000 | 3.025902000000  | 1.205374000000  |
| O | -1.035512000000 | 3.956584000000  | 0.439087000000  |
| H | -2.202309000000 | 2.734355000000  | 1.579541000000  |
| C | -0.019344000000 | 2.221420000000  | 1.674760000000  |
| H | 0.050774000000  | 2.276906000000  | 2.773328000000  |
| H | -0.167222000000 | 1.166461000000  | 1.402361000000  |
| O | 1.161422000000  | 2.746017000000  | 1.074392000000  |
| H | 0.834043000000  | 3.499196000000  | 0.521894000000  |
| C | 0.166719000000  | -2.251580000000 | 2.016669000000  |
| O | 0.695116000000  | -1.425199000000 | 2.738605000000  |
| H | -0.894446000000 | -2.545687000000 | 2.125151000000  |
| C | 0.960489000000  | -2.910598000000 | 0.920470000000  |
| H | 0.972225000000  | -4.001041000000 | 1.084656000000  |
| H | 0.458696000000  | -2.722047000000 | -0.040405000000 |
| O | 2.287016000000  | -2.392455000000 | 0.919213000000  |
| H | 2.305961000000  | -1.782234000000 | 1.696885000000  |
| S | 2.019325000000  | 0.261450000000  | -1.231682000000 |
| O | 0.651496000000  | -0.039368000000 | -0.766133000000 |
| O | 2.170675000000  | 0.886875000000  | -2.510596000000 |
| O | 2.716340000000  | 1.068503000000  | -0.081349000000 |
| O | 2.855659000000  | -1.054916000000 | -1.222899000000 |

|   |                 |                 |                 |
|---|-----------------|-----------------|-----------------|
| H | 2.068528000000  | 1.754338000000  | 0.340780000000  |
| H | 2.661744000000  | -1.589364000000 | -0.365732000000 |
| S | -2.554261000000 | -0.691954000000 | -0.492980000000 |
| O | -2.619006000000 | 0.251595000000  | 0.592427000000  |
| O | -2.136841000000 | -2.052962000000 | -0.227558000000 |
| O | -4.014450000000 | -0.701214000000 | -1.145859000000 |
| O | -1.747693000000 | -0.106335000000 | -1.709972000000 |
| H | -4.072884000000 | -1.453995000000 | -1.764069000000 |
| H | -0.760579000000 | -0.056690000000 | -1.458298000000 |

**(H<sub>2</sub>SO<sub>4</sub>)<sub>3</sub>(C<sub>2</sub>H<sub>4</sub>O<sub>2</sub>)<sub>2</sub>**

|   |                 |                 |                 |
|---|-----------------|-----------------|-----------------|
| C | 2.477227000000  | 2.003583000000  | -1.130214000000 |
| O | 3.411363000000  | 2.558530000000  | -0.592198000000 |
| H | 3.301091000000  | 0.245168000000  | -1.305330000000 |
| C | 1.125983000000  | 2.672941000000  | -1.330316000000 |
| H | 0.851700000000  | 3.153346000000  | -0.382289000000 |
| H | 1.229717000000  | 3.454307000000  | -2.094124000000 |
| O | 0.085787000000  | 1.766648000000  | -1.748168000000 |
| H | 0.416824000000  | 0.839313000000  | -1.672287000000 |
| C | 6.365012000000  | -1.212746000000 | 0.599333000000  |
| O | 7.082405000000  | -1.159075000000 | 1.570222000000  |
| H | 6.624083000000  | -1.820903000000 | -0.303749000000 |
| C | 5.052324000000  | -0.457332000000 | 0.488326000000  |
| H | 4.489195000000  | -0.558391000000 | 1.426803000000  |
| H | 5.273647000000  | 0.612338000000  | 0.355548000000  |
| O | 4.289875000000  | -0.879879000000 | -0.650023000000 |
| H | 3.677975000000  | -1.597543000000 | -0.392897000000 |
| S | -1.764532000000 | 1.962528000000  | 1.121371000000  |
| O | -1.854609000000 | 3.360036000000  | 1.415879000000  |
| O | -0.579915000000 | 1.206199000000  | 1.464297000000  |
| O | -3.054372000000 | 1.275064000000  | 1.731009000000  |
| O | -2.048469000000 | 1.732820000000  | -0.451456000000 |
| H | -2.977411000000 | 0.291186000000  | 1.613694000000  |
| H | -1.119636000000 | 1.782103000000  | -0.991736000000 |
| S | -3.669900000000 | -1.460466000000 | -0.387841000000 |
| O | -2.846371000000 | -1.320708000000 | 0.815472000000  |
| O | -3.721712000000 | -2.704198000000 | -1.090854000000 |
| O | -5.127029000000 | -1.068639000000 | 0.152087000000  |
| O | -3.322773000000 | -0.329776000000 | -1.399257000000 |
| H | -5.787372000000 | -1.293206000000 | -0.531524000000 |
| H | -2.861225000000 | 0.475571000000  | -0.960897000000 |
| S | 0.717266000000  | -1.322803000000 | 0.270993000000  |
| O | 0.054443000000  | -0.992971000000 | -1.001270000000 |
| O | 2.479872000000  | 0.753648000000  | -1.607590000000 |

|   |                 |                 |                 |
|---|-----------------|-----------------|-----------------|
| O | -0.265567000000 | -2.391400000000 | 1.024041000000  |
| O | 1.907444000000  | -2.456353000000 | -0.021339000000 |
| H | -1.194421000000 | -2.045823000000 | 0.959724000000  |
| H | 1.504231000000  | -3.243842000000 | -0.442895000000 |

**(C<sub>2</sub>H<sub>4</sub>O<sub>2</sub>)<sub>3</sub>**

|   |                 |                 |                 |
|---|-----------------|-----------------|-----------------|
| C | 1.912835000000  | 1.744008000000  | -0.179531000000 |
| O | 2.634918000000  | 1.032356000000  | 0.498932000000  |
| H | 1.974149000000  | 1.737661000000  | -1.293625000000 |
| C | 0.832931000000  | 2.648112000000  | 0.369909000000  |
| H | 0.586099000000  | 2.331958000000  | 1.396843000000  |
| H | 1.250722000000  | 3.667451000000  | 0.430665000000  |
| O | -0.277272000000 | 2.687419000000  | -0.496909000000 |
| H | -0.748346000000 | 1.819717000000  | -0.436686000000 |
| C | 1.228643000000  | -1.712893000000 | -0.290946000000 |
| O | 0.213573000000  | -1.664203000000 | 0.385823000000  |
| H | 1.236215000000  | -1.350174000000 | -1.345755000000 |
| C | 2.572803000000  | -2.188177000000 | 0.203255000000  |
| H | 2.585026000000  | -2.160354000000 | 1.304749000000  |
| H | 2.693803000000  | -3.239599000000 | -0.106052000000 |
| O | 3.614387000000  | -1.446743000000 | -0.394384000000 |
| H | 3.502113000000  | -0.512710000000 | -0.109284000000 |
| C | -3.814066000000 | -0.729546000000 | -0.318066000000 |
| O | -4.885620000000 | -1.031773000000 | 0.153390000000  |
| H | -3.481035000000 | -1.090606000000 | -1.324359000000 |
| C | -2.810005000000 | 0.172277000000  | 0.384047000000  |
| H | -3.246302000000 | 1.181158000000  | 0.432306000000  |
| H | -2.687643000000 | -0.176786000000 | 1.421620000000  |
| O | -1.574051000000 | 0.261752000000  | -0.309304000000 |
| H | -1.011142000000 | -0.520867000000 | -0.082810000000 |

**(H<sub>2</sub>SO<sub>4</sub>)<sub>1</sub>(C<sub>2</sub>H<sub>4</sub>O<sub>2</sub>)<sub>3</sub>**

|   |                |                 |                 |
|---|----------------|-----------------|-----------------|
| C | 1.990232000000 | 2.806697000000  | -0.290335000000 |
| O | 1.028550000000 | 2.774954000000  | -1.045188000000 |
| H | 2.849408000000 | 3.476192000000  | -0.517879000000 |
| C | 2.147480000000 | 2.004767000000  | 0.977601000000  |
| H | 1.602125000000 | 2.560945000000  | 1.763155000000  |
| H | 1.636609000000 | 1.035122000000  | 0.869607000000  |
| O | 3.499389000000 | 1.894683000000  | 1.353394000000  |
| H | 3.853386000000 | 1.050842000000  | 0.986565000000  |
| C | 3.166352000000 | -2.502103000000 | -0.276425000000 |
| O | 3.234372000000 | -2.886055000000 | 0.875263000000  |
| H | 2.635050000000 | -3.077669000000 | -1.061989000000 |
| C | 3.821481000000 | -1.212547000000 | -0.692752000000 |



|   |                 |                 |                 |
|---|-----------------|-----------------|-----------------|
| H | 4.592715000000  | -1.443340000000 | -1.450308000000 |
| H | 3.061823000000  | -0.579898000000 | -1.175977000000 |
| O | 4.392824000000  | -0.568682000000 | 0.431222000000  |
| H | 4.262112000000  | -1.207823000000 | 1.169060000000  |
| C | -5.491049000000 | -0.404216000000 | 0.060743000000  |
| O | -5.664391000000 | 0.789607000000  | 0.213166000000  |
| H | -6.190933000000 | -1.031023000000 | -0.531089000000 |
| C | -4.303397000000 | -1.090237000000 | 0.672253000000  |
| H | -4.652580000000 | -1.895607000000 | 1.340098000000  |
| H | -3.700633000000 | -1.551587000000 | -0.129028000000 |
| O | -3.527977000000 | -0.145159000000 | 1.396937000000  |
| H | -3.995871000000 | 0.712599000000  | 1.262117000000  |
| S | -0.718420000000 | -0.322910000000 | -0.691921000000 |
| O | 0.683913000000  | -0.645909000000 | -0.833155000000 |
| O | -1.731874000000 | -1.180018000000 | -1.257078000000 |
| O | -0.957953000000 | -0.165012000000 | 0.866152000000  |
| O | -0.993316000000 | 1.119266000000  | -1.265757000000 |
| H | -1.955345000000 | -0.129206000000 | 1.059637000000  |
| H | -0.198020000000 | 1.731460000000  | -1.099390000000 |

**(H<sub>2</sub>SO<sub>4</sub>)<sub>2</sub>(C<sub>2</sub>H<sub>4</sub>O<sub>2</sub>)<sub>3</sub>**

|   |                 |                 |                 |
|---|-----------------|-----------------|-----------------|
| C | -2.596048000000 | 2.695215000000  | -0.918007000000 |
| O | -3.788897000000 | 2.496718000000  | -0.824842000000 |
| H | -2.079240000000 | 2.741476000000  | -1.905329000000 |
| C | -1.690604000000 | 2.915567000000  | 0.281303000000  |
| H | -1.790066000000 | 3.971669000000  | 0.576602000000  |
| H | -2.046502000000 | 2.303479000000  | 1.123784000000  |
| O | -0.320580000000 | 2.684248000000  | -0.021998000000 |
| H | -0.172422000000 | 1.714805000000  | -0.033457000000 |
| C | -5.891402000000 | -1.119241000000 | 0.413749000000  |
| O | -6.016171000000 | -1.726602000000 | 1.460735000000  |
| H | -6.753146000000 | -0.908150000000 | -0.252511000000 |
| C | -4.544956000000 | -0.616627000000 | -0.018211000000 |
| H | -4.281423000000 | -1.047075000000 | -0.998210000000 |
| H | -4.577506000000 | 0.477860000000  | -0.150200000000 |
| O | -3.579296000000 | -0.970607000000 | 0.969225000000  |
| H | -4.095124000000 | -1.467312000000 | 1.650180000000  |
| C | 3.229858000000  | 2.183291000000  | 0.311190000000  |
| O | 3.650900000000  | 1.584080000000  | -0.671594000000 |
| H | 3.032233000000  | 1.649136000000  | 1.265246000000  |
| C | 2.895935000000  | 3.651795000000  | 0.314575000000  |
| H | 3.787766000000  | 4.187684000000  | 0.683013000000  |
| H | 2.720224000000  | 3.985667000000  | -0.721383000000 |
| O | 1.831065000000  | 3.931952000000  | 1.192016000000  |

|   |                 |                 |                 |
|---|-----------------|-----------------|-----------------|
| H | 1.012999000000  | 3.535302000000  | 0.807631000000  |
| S | 3.316876000000  | -1.790185000000 | 0.350988000000  |
| O | 4.350231000000  | -2.380799000000 | 1.139897000000  |
| O | 2.343134000000  | -0.928564000000 | 1.056893000000  |
| O | 3.894995000000  | -0.969358000000 | -0.849004000000 |
| O | 2.554812000000  | -2.949258000000 | -0.378074000000 |
| H | 3.808390000000  | 0.046902000000  | -0.701778000000 |
| H | 1.734491000000  | -2.592717000000 | -0.839782000000 |
| S | -0.630569000000 | -1.093751000000 | -0.789651000000 |
| O | 0.366667000000  | -1.897855000000 | -1.474209000000 |
| O | -1.542628000000 | -0.281289000000 | -1.552296000000 |
| O | -1.409676000000 | -2.067778000000 | 0.149795000000  |
| O | 0.111386000000  | -0.099588000000 | 0.200329000000  |
| H | -2.280355000000 | -1.628457000000 | 0.490903000000  |
| H | 1.014512000000  | -0.489685000000 | 0.541340000000  |

**(H<sub>2</sub>SO<sub>4</sub>)<sub>3</sub>(C<sub>2</sub>H<sub>4</sub>O<sub>2</sub>)<sub>3</sub>**

|   |                 |                 |                 |
|---|-----------------|-----------------|-----------------|
| C | -3.033983000000 | 2.829649000000  | -1.400397000000 |
| O | -4.038262000000 | 2.441254000000  | -0.826501000000 |
| H | -2.424881000000 | 2.151700000000  | -2.033598000000 |
| C | -2.568955000000 | 4.249668000000  | -1.294126000000 |
| H | -1.526542000000 | 4.225534000000  | -0.925987000000 |
| H | -2.521212000000 | 4.662447000000  | -2.320962000000 |
| O | -3.387043000000 | 5.031332000000  | -0.468404000000 |
| H | -4.095128000000 | 4.433486000000  | -0.156465000000 |
| C | -5.020818000000 | -0.406993000000 | 0.198713000000  |
| O | -4.956475000000 | -1.604492000000 | 0.492060000000  |
| H | -4.230563000000 | 0.094631000000  | -0.384409000000 |
| C | -6.174259000000 | 0.416848000000  | 0.633337000000  |
| H | -5.756356000000 | 1.272322000000  | 1.200203000000  |
| H | -6.603662000000 | 0.874710000000  | -0.279740000000 |
| O | -7.141229000000 | -0.273020000000 | 1.369952000000  |
| H | -6.836217000000 | -1.195477000000 | 1.455405000000  |
| C | 1.027028000000  | 1.337095000000  | 1.902472000000  |
| O | 2.182582000000  | 1.347876000000  | 2.296866000000  |
| H | 0.223024000000  | 0.930979000000  | 2.554698000000  |
| C | 0.559557000000  | 1.874317000000  | 0.569830000000  |
| H | 0.714941000000  | 2.965928000000  | 0.600806000000  |
| H | 1.222074000000  | 1.492357000000  | -0.222412000000 |
| O | -0.810842000000 | 1.643639000000  | 0.328230000000  |
| H | -0.953430000000 | 0.725479000000  | 0.022018000000  |
| S | 2.258373000000  | -1.933628000000 | -0.249480000000 |
| O | 3.592982000000  | -2.137007000000 | 0.276799000000  |
| O | 1.266768000000  | -1.408899000000 | 0.694114000000  |

|   |                 |                 |                 |
|---|-----------------|-----------------|-----------------|
| O | 2.305765000000  | -1.014140000000 | -1.508649000000 |
| O | 1.759379000000  | -3.273707000000 | -0.845905000000 |
| H | 2.898223000000  | -0.194018000000 | -1.306881000000 |
| H | 0.754869000000  | -3.221479000000 | -1.037292000000 |
| S | 4.884166000000  | 1.253231000000  | -0.076351000000 |
| O | 3.659450000000  | 1.038171000000  | -0.869604000000 |
| O | 5.974811000000  | 1.962270000000  | -0.658734000000 |
| O | 4.471788000000  | 2.003109000000  | 1.231544000000  |
| O | 5.420564000000  | -0.151003000000 | 0.400231000000  |
| H | 3.549587000000  | 1.732386000000  | 1.571834000000  |
| H | 4.712165000000  | -0.858883000000 | 0.394917000000  |
| S | -1.655064000000 | -2.278891000000 | -0.352804000000 |
| O | -1.849706000000 | -0.869950000000 | -0.652830000000 |
| O | -0.798688000000 | -3.037490000000 | -1.257667000000 |
| O | -1.113989000000 | -2.437555000000 | 1.123718000000  |
| O | -3.000935000000 | -3.018246000000 | -0.263544000000 |
| H | -0.167993000000 | -2.088189000000 | 1.120400000000  |
| H | -3.785266000000 | -2.395957000000 | 0.053251000000  |

**H<sub>2</sub>O**

|   |                 |                 |                |
|---|-----------------|-----------------|----------------|
| O | 0.000000000000  | 0.118882000000  | 0.000000000000 |
| H | 0.764475000000  | -0.475529000000 | 0.000000000000 |
| H | -0.764475000000 | -0.475529000000 | 0.000000000000 |

**(H<sub>2</sub>SO<sub>4</sub>)(H<sub>2</sub>O)**

|   |                 |                 |                 |
|---|-----------------|-----------------|-----------------|
| S | 0.574100000000  | 0.074192000000  | 0.128480000000  |
| O | -0.228971000000 | -0.386595000000 | 1.239489000000  |
| O | 1.737470000000  | 0.893765000000  | 0.309622000000  |
| O | 1.015548000000  | -1.280946000000 | -0.628258000000 |
| O | -0.358121000000 | 0.786822000000  | -0.923700000000 |
| H | 1.765860000000  | -1.065191000000 | -1.213280000000 |
| H | -1.320419000000 | 0.493113000000  | -0.746103000000 |
| O | -2.677872000000 | -0.107847000000 | -0.117951000000 |
| H | -3.322309000000 | 0.552297000000  | 0.179793000000  |
| H | -2.213170000000 | -0.408888000000 | 0.690302000000  |

**(H<sub>2</sub>SO<sub>4</sub>)<sub>2</sub>(H<sub>2</sub>O)**

|   |                |                 |                 |
|---|----------------|-----------------|-----------------|
| S | 1.820061000000 | -0.360864000000 | -0.014994000000 |
| O | 2.380761000000 | 1.060200000000  | -0.131115000000 |
| O | 1.120750000000 | -0.532274000000 | 1.255078000000  |
| O | 3.150529000000 | -1.233817000000 | 0.000554000000  |
| O | 1.122822000000 | -0.777854000000 | -1.216230000000 |
| H | 1.573735000000 | 1.831996000000  | -0.042718000000 |
| H | 3.627045000000 | -1.077866000000 | 0.838605000000  |

|   |                 |                 |                 |
|---|-----------------|-----------------|-----------------|
| S | -2.136651000000 | -0.117731000000 | -0.005287000000 |
| O | -1.579644000000 | -0.747590000000 | 1.333364000000  |
| O | -3.555119000000 | -0.249001000000 | 0.016653000000  |
| O | -1.588652000000 | -1.066748000000 | -1.145365000000 |
| O | -1.540511000000 | 1.204536000000  | -0.184713000000 |
| H | -0.582931000000 | -0.665944000000 | 1.366751000000  |
| H | -0.599590000000 | -0.960142000000 | -1.241861000000 |
| O | 0.583560000000  | 2.717467000000  | 0.077026000000  |
| H | -0.268653000000 | 2.189381000000  | 0.027882000000  |
| H | 0.559878000000  | 3.340740000000  | -0.666186000000 |

**(H<sub>2</sub>SO<sub>4</sub>)<sub>3</sub>(H<sub>2</sub>O)**

|   |                 |                 |                 |
|---|-----------------|-----------------|-----------------|
| H | -1.019411000000 | -0.091052000000 | 1.906170000000  |
| H | 0.552617000000  | -0.484124000000 | 2.066554000000  |
| S | 1.011641000000  | 2.133472000000  | -0.134268000000 |
| O | -0.019773000000 | 1.419394000000  | -0.902742000000 |
| O | 0.685458000000  | 2.322323000000  | 1.285167000000  |
| H | 0.168631000000  | 1.093934000000  | 1.988309000000  |
| O | 2.354162000000  | 1.548434000000  | -0.380465000000 |
| S | -2.860778000000 | -0.398370000000 | -0.107882000000 |
| O | -2.144073000000 | -1.304671000000 | -1.185194000000 |
| O | -2.575826000000 | 1.070733000000  | -0.571590000000 |
| O | -4.265123000000 | -0.617434000000 | -0.201088000000 |
| O | -2.202772000000 | -0.640886000000 | 1.185103000000  |
| H | -1.206625000000 | -1.522234000000 | -0.929306000000 |
| H | -1.582596000000 | 1.255575000000  | -0.670992000000 |
| S | 1.679705000000  | -1.813364000000 | -0.084644000000 |
| O | 2.552563000000  | -3.142705000000 | -0.110574000000 |
| O | 2.539143000000  | -0.863396000000 | -0.927174000000 |
| O | 0.411949000000  | -2.106532000000 | -0.729436000000 |
| O | 1.662398000000  | -1.403050000000 | 1.310488000000  |
| H | 2.277267000000  | -3.684676000000 | -0.874238000000 |
| H | 2.423497000000  | 0.180022000000  | -0.676804000000 |
| O | 1.096739000000  | 3.644445000000  | -0.653397000000 |
| H | 1.442758000000  | 3.641806000000  | -1.565972000000 |
| O | -0.137997000000 | 0.181213000000  | 2.379024000000  |

**NH<sub>3</sub>**

|   |                 |                 |                |
|---|-----------------|-----------------|----------------|
| N | 0.000000000000  | 0.000011000000  | 0.000000000000 |
| H | -0.597460000000 | 0.805972000000  | 0.000000000000 |
| H | 0.996726000000  | 0.114344000000  | 0.000000000000 |
| H | -0.399266000000 | -0.920390000000 | 0.000000000000 |

**(H<sub>2</sub>SO<sub>4</sub>)(NH<sub>3</sub>)**

|   |                 |                 |                 |
|---|-----------------|-----------------|-----------------|
| S | -0.601017000000 | -0.113292000000 | 0.093730000000  |
| O | 0.090911000000  | 0.002166000000  | 1.357681000000  |
| O | -1.771391000000 | -0.936022000000 | -0.059196000000 |
| O | -1.024526000000 | 1.415627000000  | -0.263719000000 |
| O | 0.415862000000  | -0.471713000000 | -1.031394000000 |
| H | -1.746793000000 | 1.367402000000  | -0.916471000000 |
| H | 1.419222000000  | -0.245813000000 | -0.693293000000 |
| N | 2.740920000000  | 0.039902000000  | -0.054125000000 |
| H | 2.448314000000  | 0.177149000000  | 0.916689000000  |
| H | 3.407449000000  | -0.730931000000 | -0.083846000000 |
| H | 3.214781000000  | 0.885083000000  | -0.370865000000 |

**(H<sub>2</sub>SO<sub>4</sub>)<sub>2</sub>(NH<sub>3</sub>)**

|   |                 |                 |                 |
|---|-----------------|-----------------|-----------------|
| S | 1.833768000000  | -0.330141000000 | -0.036615000000 |
| O | 2.451676000000  | 0.930680000000  | -0.507064000000 |
| O | 1.088046000000  | -0.105196000000 | 1.224174000000  |
| O | 3.053260000000  | -1.327913000000 | 0.292347000000  |
| O | 1.084565000000  | -1.064898000000 | -1.053522000000 |
| H | 1.373107000000  | 2.092243000000  | -0.242017000000 |
| H | 3.679973000000  | -0.862585000000 | 0.876572000000  |
| S | -2.116158000000 | -0.150145000000 | -0.007265000000 |
| O | -1.480443000000 | -0.550711000000 | 1.375440000000  |
| O | -3.528149000000 | -0.334639000000 | 0.078098000000  |
| O | -1.548477000000 | -1.198901000000 | -1.028915000000 |
| O | -1.614384000000 | 1.180702000000  | -0.381937000000 |
| H | -0.470755000000 | -0.420106000000 | 1.350359000000  |
| H | -0.536642000000 | -1.145963000000 | -1.075600000000 |
| N | 0.527572000000  | 2.725478000000  | -0.039564000000 |
| H | -0.346517000000 | 2.119880000000  | -0.129382000000 |
| H | 0.485001000000  | 3.500961000000  | -0.702809000000 |
| H | 0.592300000000  | 3.088803000000  | 0.912950000000  |

**(H<sub>2</sub>SO<sub>4</sub>)<sub>3</sub>(NH<sub>3</sub>)**

|   |                 |                 |                 |
|---|-----------------|-----------------|-----------------|
| S | 2.938705000000  | 0.309126000000  | -0.121476000000 |
| O | 2.241578000000  | 1.305870000000  | -1.132212000000 |
| O | 2.330982000000  | 0.506111000000  | 1.196641000000  |
| O | 2.563616000000  | -1.121764000000 | -0.654975000000 |
| O | 4.350160000000  | 0.456802000000  | -0.265870000000 |
| H | -3.305313000000 | 3.151894000000  | 0.040370000000  |
| H | 1.026836000000  | -0.047789000000 | 2.055876000000  |
| S | -1.613758000000 | 1.873119000000  | -0.094021000000 |
| O | -2.426364000000 | 0.956830000000  | -1.023172000000 |
| O | -1.738519000000 | 1.431891000000  | 1.290585000000  |
| O | -0.290674000000 | 2.156047000000  | -0.596068000000 |

|   |                 |                 |                 |
|---|-----------------|-----------------|-----------------|
| O | -2.385544000000 | 3.258704000000  | -0.268839000000 |
| H | 1.313337000000  | 1.532363000000  | -0.854446000000 |
| S | -1.140782000000 | -2.095167000000 | -0.143486000000 |
| O | -1.186755000000 | -3.520555000000 | -0.883885000000 |
| O | -0.037884000000 | -1.305654000000 | -0.716950000000 |
| O | -2.447405000000 | -1.448044000000 | -0.448318000000 |
| O | -0.963435000000 | -2.468052000000 | 1.256230000000  |
| H | -1.420359000000 | -3.374255000000 | -1.819818000000 |
| H | 1.562406000000  | -1.264877000000 | -0.648573000000 |
| H | -2.400356000000 | -0.093469000000 | -0.746822000000 |
| N | 0.113449000000  | -0.275183000000 | 2.532309000000  |
| H | -0.247032000000 | -1.196997000000 | 2.175948000000  |
| H | -0.575411000000 | 0.450616000000  | 2.243505000000  |
| H | 0.227051000000  | -0.289947000000 | 3.546201000000  |
